# Supplementary material
Source: bioRxiv or medRxiv preprint supplement (https://medrxiv.org/highwire/filestream/77505/field_highwire_adjunct_files/0/2020.04.06.20056119-1.zip)

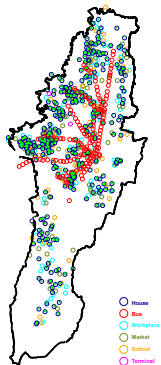

Epidemic dynamics

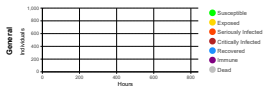

Districts

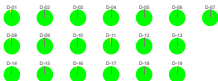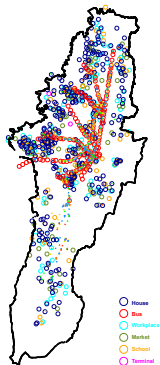

Epidemic dynamics

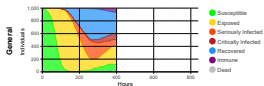

Districts

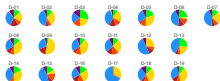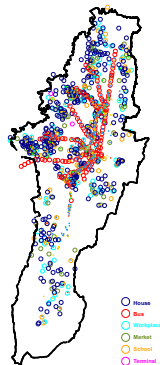

Epidemic dynamics

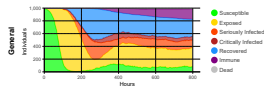

Districts

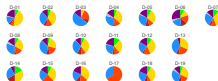

Supplement: Supplementary file [file 2020.04.06.20056119-1.zip]
