# Supplementary material
Source: bioRxiv or medRxiv preprint supplement (https://medrxiv.org/highwire/filestream/77505/field_highwire_adjunct_files/0/2020.04.06.20056119-1.zip)

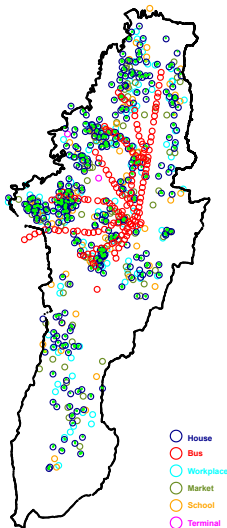

# INFEKTA: A General Agent Based Model for Transmission of Infectious Diseases: Studying the COVID19 Propagation in Bogotá - Colombia

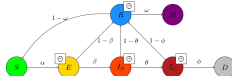

## Parameters

Exposed time (T<sub>E</sub>)

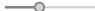

I.Critically time (T<sub>IS</sub>)

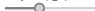

I.Seriously time (T<sub>IC</sub>)

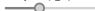

Recovered time (T<sub>R</sub>)

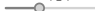

Infection probability ( $\alpha$ )

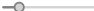

I.Seriously probability ( $\beta$ )

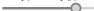

I.Critically probability ( $\theta$ )

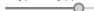

Immune probability ( $\omega$ )

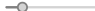

Dead probability ( $\phi$ )

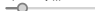

## Social separation rule

- ☒ None
- ☐ Soft
- ☐ Medium
- ☐ Extreme
- ☐ Total

## Epidemic dynamics

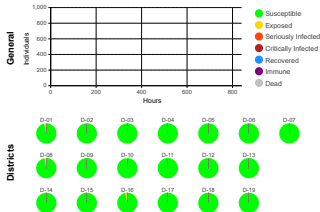

Supplement: Supplementary file [file 2020.04.06.20056119-1.zip]
